# Supplementary material for: Riesgos en la utilización de plaguicidas
Source: Royal Society of Chemistry journal article supplement (doi:10.1039/c5an00944h), 1989-01-01
Supplement: c5an00944h1.pdf [file c5an00944h1.pdf]

Electronic Supplementary Information for  
**A Comparative Study of Three Different Nucleic Acid Amplification  
Techniques Combined with Microchip Electrophoresis for HPV16  
E6/E7 mRNA Detection**

Quanli Liu<sup>a,b</sup>, Xuexia Lin<sup>a,b</sup>, Luyao Lin<sup>b</sup>, Linglu Yi<sup>a,b</sup>, Haifang Li<sup>b</sup>, Jin-Ming Lin<sup>b\*</sup>

<sup>a</sup> State Key Laboratory of Chemical Resource Engineering, Beijing University of Chemical Technology,  
Beijing 100029, China

<sup>b</sup> Beijing Key Laboratory of Microanalytical Methods and Instrumentation, Department of Chemistry,  
Tsinghua University, Beijing 100084, China

\*Corresponding author. Email: [jmlin@mail.tsinghua.edu.cn](mailto:jmlin@mail.tsinghua.edu.cn)

**Table of content:**

1. Experimental details. (S3-S4)
2. Sequences of RT-PCR and NASBA primers used in this study. (S5)
3. The setup and mechanism of MCE. (S6)
4. The electrophoretogram of DNA and RNA running buffer. (S7)
5. The quality of extracted RNA. (S8)
6. Optimization of NASBA detecting conditions by response surface method (RSM). (S9)
7. The specificity of NASBE-MCE for E6/E7 mRNA detection. (S10)
8. The reproducibility of NASBE-MCE and two step RT-PCR-MCE for E6/E7 mRNA detection. (S11)
9. The electrophoretogram of two-step RT-PCR DNA amplified products from different number of CaSki cells. (S12)

---

\*Corresponding authors. Tel/Fax: +86-10-62792343. E-mail addresses: [jmlin@mail.tsinghua.edu.cn](mailto:jmlin@mail.tsinghua.edu.cn) (J.-M. Lin),  
[lihaifang@mail.tsinghua.edu.cn](mailto:lihaifang@mail.tsinghua.edu.cn) (H. Li)

## 1. Experimental details

The CaSki and Hela cell lines were used as positive controls, HUVEC cell line was used as a negative control. All cell lines were purchased from Cell Culture Center of Cancer Institute & Hospital Chinese Academy of Medical Science (Beijing, China). The CaSki cells were cultured in DMEM media (GIBCO, Grand Island, NY), Hela cells and HUVEC cells were grown in RPMI 1640 media (GIBCO, Grand Island, NY). Every cell media were supplemented with 10% fetal bovine serum, 100µg/mL penicillin and 100 µg/mL streptomycin. Cells were maintained in a humidified atmosphere with 5% CO<sub>2</sub> at 37°C.

Three kinds of nucleic acid amplification techniques mentioned above were described in detail as following. In the procedure of NASBA, 2 µL RNA templates were added to 17µL of NASBA solution including 40 mM Tris-HCl pH 8.5, 12 mM MgCl<sub>2</sub>, 70mM KCl, 5 mM dithiothreitol, 15% dimethyl sulphoxide, 1 mM of each dNTP, 2 mM of ATP, CTP, UTP and GTP, 10 pM of each primer, and then pre-incubated at 65 °C for 5 min. Enzyme mix (0.08 U RNase H, 50 U T7 RNA polymerase, 6 U avian myeloblastosis virus reverse transcriptase (AMV) was then added, and the reaction mix was incubated at 44 °C for 109 min. RSM was used to optimize four factors of NASBA system, that is, T7 RNA polymerase, AMV reverse transcriptase, incubate duration and incubate temperature. The HPV16 E6/E7 mRNA products from NASBA amplification were analyzed by MCE. Reverse transcription product of E6/E7 DNA was amplified by RT-PCR. The standard protocol of two-step RT-PCR in this work was listed as following. At the first step, 3µL of RNA template was added, and then reverse transcription was carried out according to the protocol of TIANScript RT Kit. At the second step, the reaction volume was fixed at 50µL. It contained 5µL of 5× PCR buffer including 2.5 mM MgCl<sub>2</sub>, 200 µM dNTP, 200 nM of each primer, 2 µL of cDNA and 1.5 U TaqDNA polymerase. Subsequently, inactivation of reverse transcriptase and activation of Taq DNA polymerase were achieved by incubation at 95 °C for 5 min, followed by 35 cycles of 95 °C for 35 s, 57 °C (55 °C for HPV18) for 35 s and 72 °C for 35 s. For one-step RT-PCR, the reaction mix volume was 20 µL, including 2 µL of 5× RT buffer, 2 µL of 5× PCR buffer, 3 µL of 2.5 mM dNTP, 2 µL of 25 mM MgCl<sub>2</sub>, 2 µL of Oligo(dT)<sub>15</sub>, 1 µL of 200U/µL TIANScript M-MLV (Moloney Murine Leukemia Virus) reverse transcriptase, 0.3

$\mu\text{L}$  of 5 U/ $\mu\text{L}$  Taq DNA polymerase, 3  $\mu\text{L}$  of RNA template and 4.7  $\mu\text{L}$  of ddH<sub>2</sub>O. The reaction was incubated at 42 °C for 50 min at first. Then, inactivation of reverse transcriptase and activation of Taq DNA polymerase were accomplished by incubation at 95 °C for 5 min, followed by 35 cycles of 95 °C for 35 s, 57 °C for 35 s and 72 °C for 35 s. For one-step RT-touchdown-PCR, the reaction was incubated at 42 °C for 50 min at first. Then, inactivation of reverse transcriptase and activation of Taq DNA polymerase were completed by incubation at 95 °C for 5 min. The first cycling phase begins with an annealing temperature of 72 °C (70 °C for HPV18) for 35 s, and then decreased annealing temperature by 1 °C per cycle until 57 °C (55 °C for HPV18) for 15 cycles in total, then followed by 20 cycles at 95 °C for 35 s, 57 °C (55 °C for HPV18) for 35 s and 72 °C for 35 s. The RT-PCR products were analyzed by MCE. The sequence of each primer was shown in [Tab. S1](#).

DNA/RNA products were labeled by fluorescence dye SYBR Gold which can bind to both DNA and RNA. Different DNA or RNA fragments were separated in electrophoresis channel, and arrived in detection window based on their different migration rates. Discrimination among each injection was eliminated with the use of two DNA markers as internal standards. Before every analysis, the chip was washed by ultrapure water. Running buffer for electrophoresis separation was prepared in advance. Then, DNA or RNA fragments were introduced into the separation channel via double-T injection.

## 2. Sequences of RT-PCR and NASBA primers used in this study.

**Tab. S1** Sequences of RT-PCR and NASBA primers used in this study.

| Primer purpose | HPV genotype | Amplicon (bp) | Sequence (5'-3')                                   | Position (bp) |
|----------------|--------------|---------------|----------------------------------------------------|---------------|
| PCR            | 16           | 168           | ACCGGTCGATGTATGTCTTGTTGCA                          | 500-524       |
|                |              |               | CCTCCTCCTCTGAGCTGTCATTTAA                          | 667-643       |
|                | 18           | 98            | AGTGCCATTCGTGCTGCAAC                               | 514-533       |
|                |              |               | ATGTTGCCTTAGGTCCATGCAT                             | 611-590       |
|                | β-actin      | 205           | CTGGAAGGTGGACAGCGAGG                               | 939-958       |
|                |              |               | TGACGTGGACATCCGCAAAG                               | 1143-1124     |
| NASBA          | 16           | 168           | ACCGGTCGATGTATGTCTTGTTGCA                          | 500-524       |
|                |              |               | AATTCTAATACGACTCACTATAGGGCCTCCTCCTCTGAGCTGTCATTTAA | 667-643       |
|                | β-actin      | 205           | TGACGTGGACATCCGCAAAG                               | 939-958       |
|                |              |               | AATTCTAATACGACTCACTATAGGG CTGGAAGGTGGACAGCGAGG     | 1143-1124     |

### 3. The setup and mechanism of MCE.

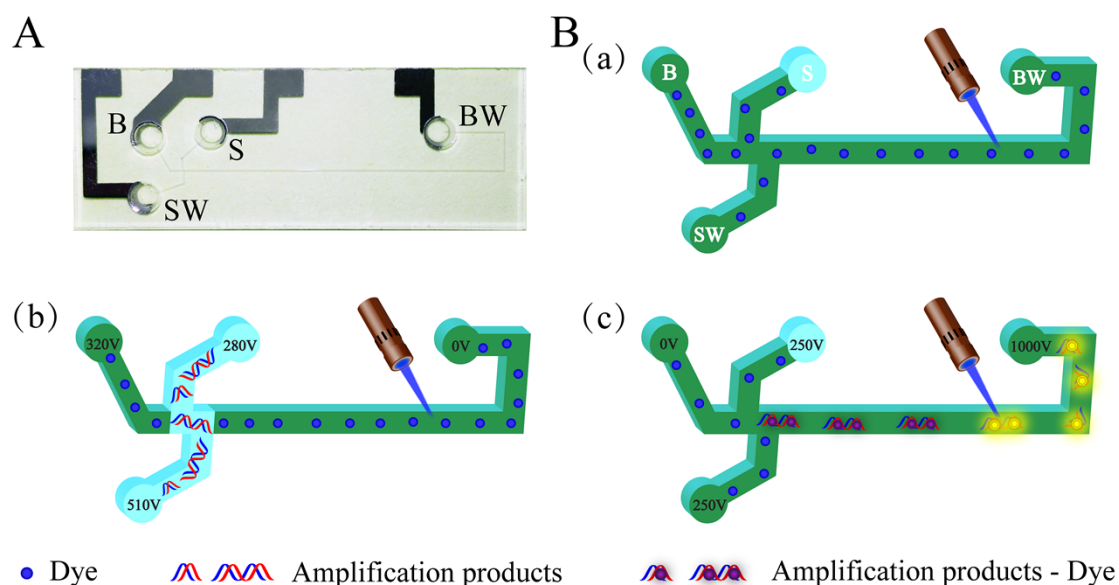

**Fig. S1** The setup and mechanism of MCE. A. Pictures of device setup. B. The mechanism of MCE for DNA assay. (a) sample loading; (b) sample injection; (c) sample separation.

### 4. The electrophoretogram of DNA and RNA running buffer.

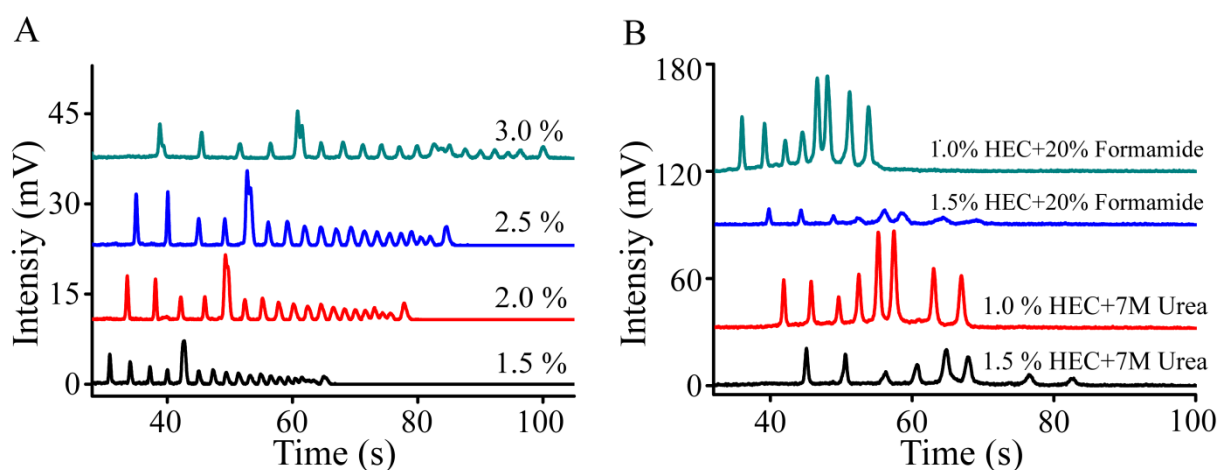

**Fig. S2** The electrophoretogram of DNA and RNA running buffer. A. The electrophoretogram of DNA500 ladder separated by different concentrations of HEC solution (1.5%, 2.0%, 2.5%, 3.0% w/v, respectively). B. The electrophoretogram of RNA1000 ladder separated by different running buffer. Urea or formamide was used as denaturant.

## 5. The quality of extracted RNA.

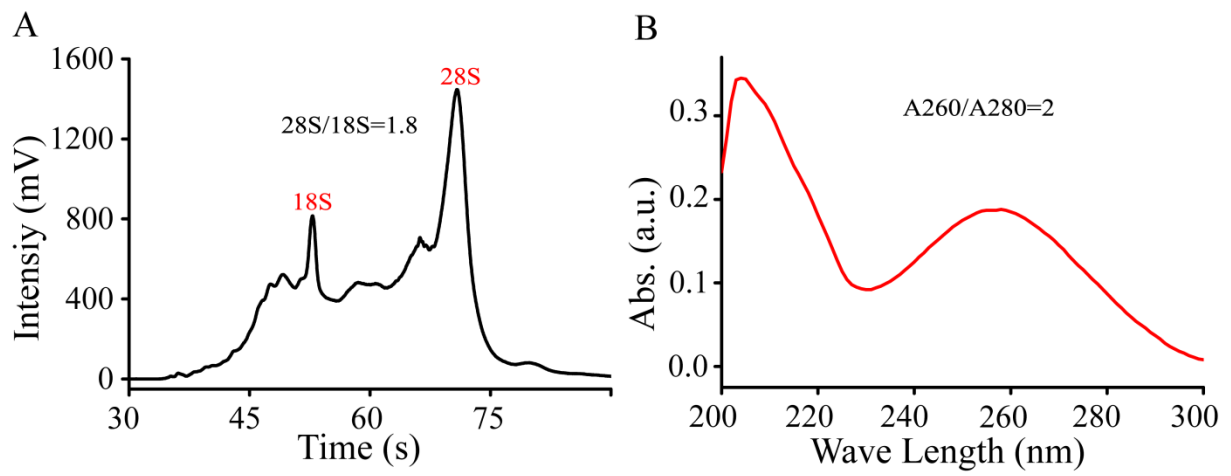

**Fig. S3** The quality of extracted RNA. A. The electrophoretogram of total RNA. B. The ultraviolet absorption spectrum of total RNA.

## 6. Optimization of NASBA detecting conditions by response surface methodology (RSM).

**Tab. S2** Response Surface Methodology (RSM) design in NASBA for HPV16 E6/E7 mRNA detection.

| Run No. | Factor 1<br>Time (min) | Factor 2<br>Temp (°C) | Factor 3<br>T7 poly (U) | Factor 4<br>AMV RT (U) |
|---------|------------------------|-----------------------|-------------------------|------------------------|
| 1       | 120                    | 38                    | 40                      | 6                      |
| 2       | 60                     | 41                    | 40                      | 10                     |
| 3       | 120                    | 38                    | 30                      | 8                      |
| 4       | 120                    | 41                    | 40                      | 8                      |
| 5       | 120                    | 44                    | 40                      | 6                      |
| 6       | 120                    | 41                    | 40                      | 8                      |
| 7       | 120                    | 41                    | 30                      | 6                      |
| 8       | 120                    | 44                    | 50                      | 8                      |
| 9       | 120                    | 41                    | 40                      | 8                      |
| 10      | 120                    | 38                    | 40                      | 10                     |
| 11      | 120                    | 44                    | 40                      | 10                     |
| 12      | 60                     | 38                    | 40                      | 8                      |
| 13      | 180                    | 41                    | 30                      | 8                      |
| 14      | 120                    | 41                    | 50                      | 6                      |
| 15      | 120                    | 41                    | 40                      | 8                      |
| 16      | 180                    | 41                    | 40                      | 6                      |
| 17      | 120                    | 44                    | 30                      | 8                      |
| 18      | 120                    | 41                    | 50                      | 10                     |
| 19      | 180                    | 41                    | 50                      | 8                      |
| 20      | 60                     | 41                    | 50                      | 8                      |
| 21      | 120                    | 38                    | 50                      | 8                      |
| 22      | 180                    | 38                    | 40                      | 8                      |
| 23      | 60                     | 41                    | 30                      | 8                      |
| 24      | 180                    | 44                    | 40                      | 8                      |
| 25      | 120                    | 41                    | 30                      | 10                     |
| 26      | 120                    | 41                    | 40                      | 8                      |
| 27      | 60                     | 44                    | 40                      | 8                      |
| 28      | 60                     | 41                    | 40                      | 6                      |
| 29      | 180                    | 41                    | 40                      | 10                     |

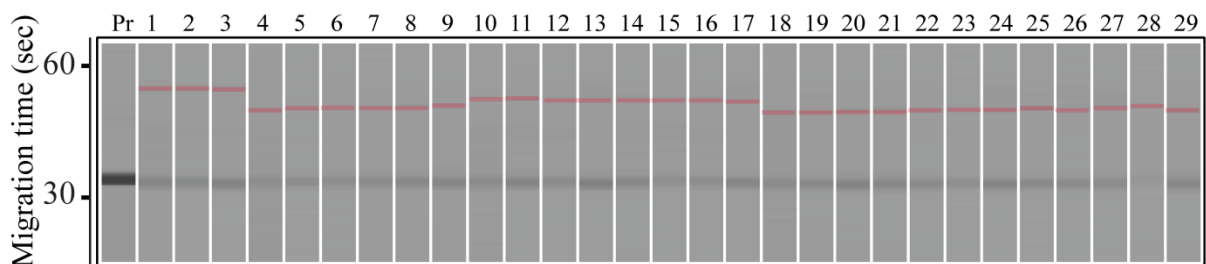

**Fig. S4** The gel images of RSM projects in NASBA. Pr: negative control which contains primers only.

## 7. The specificity of NASBE-MCE for E6/E7 mRNA detection.

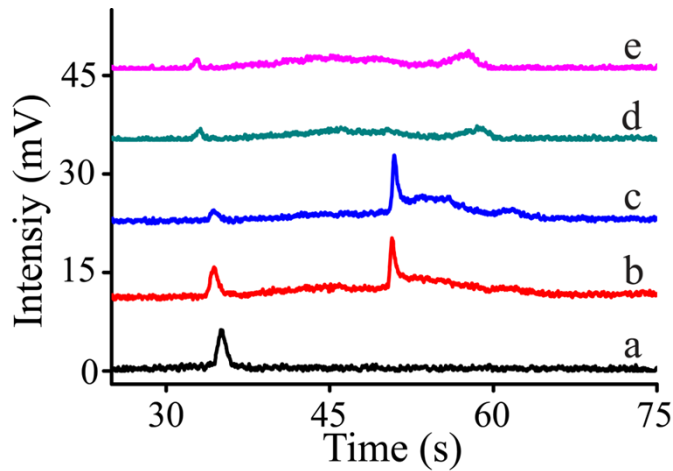

**Fig. S5** The specificity of NASBE-MCE for E6/E7 mRNA detection. a, b, c, d, e were blank, beta-actin of Hela, beta-actin of HUVEC, negative control of Hela, negative control of HUVEC.

## 8. The reproducibility of NASBE-MCE and two step RT-PCR-MCE for E6/E7 mRNA detection.

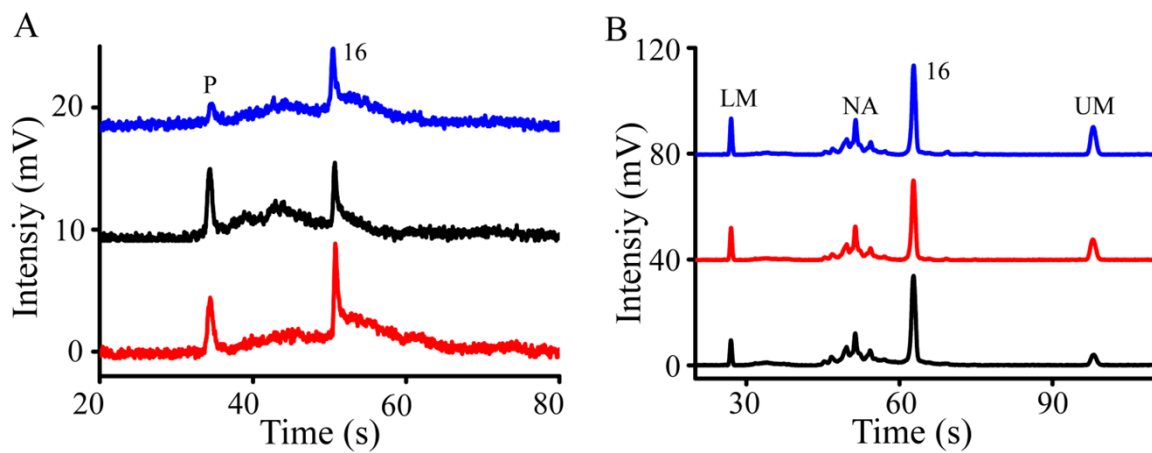

**Fig. S6** The reproducibility of NASBE-MCE and two step RT-PCR-MCE for E6/E7 mRNA detection. A. The reproducibility of NASBE-MCE for E6/E7 mRNA detection. P: peaks of primers. 16: HPV16 E6/E7 mRNA amplification products. B. The reproducibility of two step RT-PCR-MCE for E6/E7 mRNA detection. LM: lower marker. UM: upper marker. NA: nonspecific amplification. 16: HPV16 E6/E7 mRNA amplification products.



**9. The electrophoretogram of two-step RT-PCR DNA amplified products from different number of CaSki cells.**

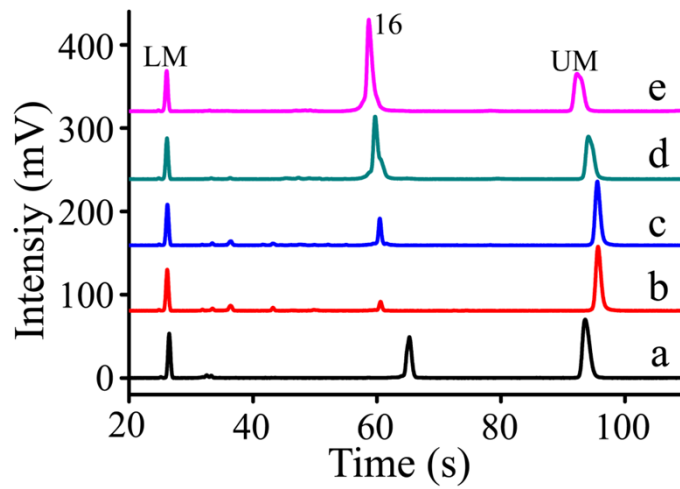

**Fig. S7** The electrophoretogram of two-step RT-PCR DNA amplified products from different number of CaSki cells (from  $10^0$  to  $10^3$  of the CaSki cells number). a, b, c, d, e were beta-actin,  $10^0$ ,  $10^1$ ,  $10^2$ ,  $10^3$ . LM: lower marker. UM: upper marker. 16: HPV16 E6/E7 mRNA amplification products.
